# Supplementary material for: Symmetric and unsymmetric donor functionalization. comparing structural and spectral benefits of chromophores for dye-sensitized solar cells
Source: Royal Society of Chemistry journal article supplement (doi:10.1039/b911397p), 2009-01-01
Supplement: b911397p.pdf [file b911397p.pdf]

# Symmetric and Unsymmetric Donor Functionalization. Comparing Structural and Spectral Benefits of Chromophores for Dye Sensitized Solar Cells.

Daniel P. Hagberg,<sup>a</sup> Xiao Jiang,<sup>b</sup> Erik Gabrielsson,<sup>a</sup> Mats Linder,<sup>c</sup> Tannia Marinado,<sup>b</sup> Tore Brinck,<sup>c</sup> Anders Hagfeldt<sup>b,d</sup> and Licheng Sun<sup>\*,a</sup>

*Center of Molecular Devices, Department of Chemistry, KTH Chemical Science and Engineering, 10044 Stockholm, Sweden and Department of Physical and Analytical Chemistry, Uppsala University, Box 259, 75105 Uppsala, Sweden.*

## Supporting Information

### Table of contents

|                                                             |       |
|-------------------------------------------------------------|-------|
| General Experimental                                        | 2     |
| <sup>1</sup> H NMR and <sup>13</sup> C NMR Spectra          | 3-10  |
| Complete reference 29                                       | 11    |
| Calculated electronic and spectral data for the three dyes. | 11    |
| Molecular coordinates                                       | 11-16 |

## General Experimental

$^1\text{H}$  and  $^{13}\text{C}$  NMR spectra were recorded on Bruker 500 and 400 MHz instruments by using the residual signals  $\delta = 7.26$  ppm and 77.0 ppm from  $\text{CDCl}_3$ ,  $\delta = 2.50$  and 39.4 ppm from  $[\text{D}_6]\text{DMSO}$  and  $\delta = 2.05$ , 29.84, and 206.26 ppm from  $[\text{D}_6]\text{acetone}$ , as internal references for  $^1\text{H}$  and  $^{13}\text{C}$  respectively. HRMS were performed using a Q-ToF Micro (Micromass Inc., Manchester, England) mass spectrometer equipped with a Z-spray ionization source.

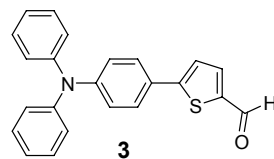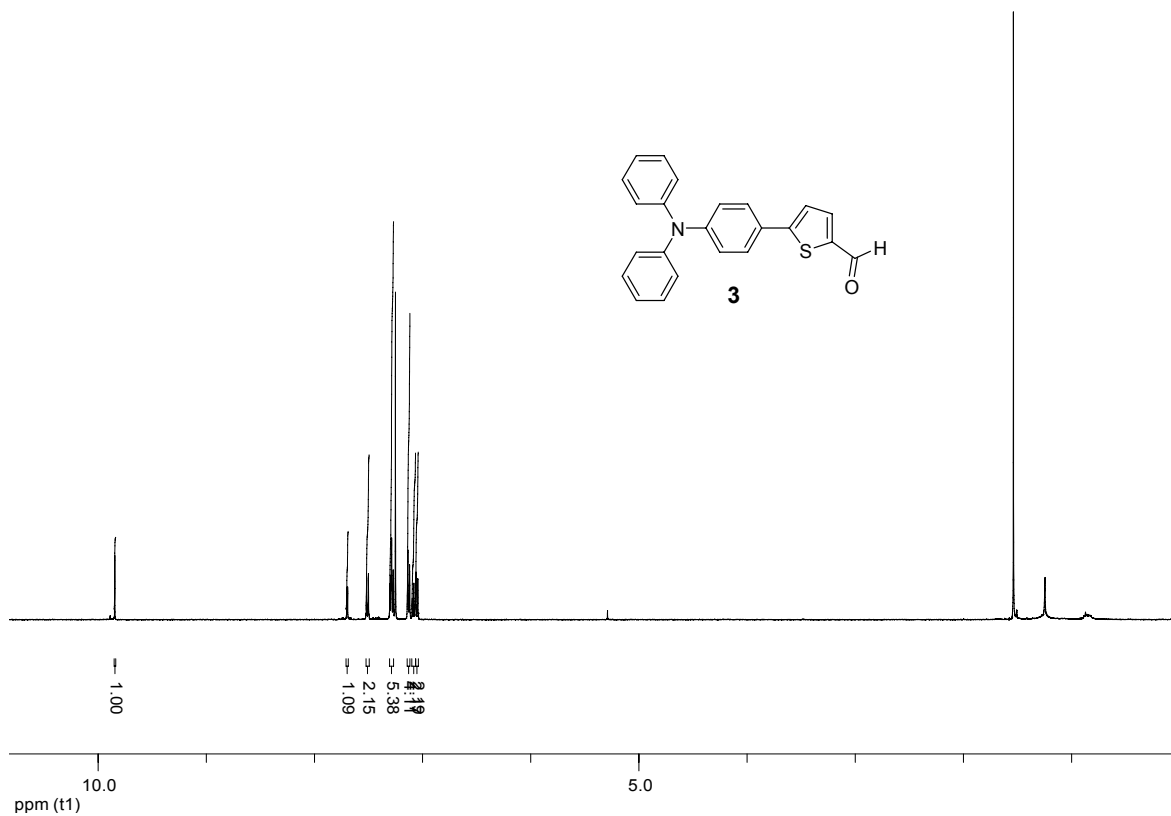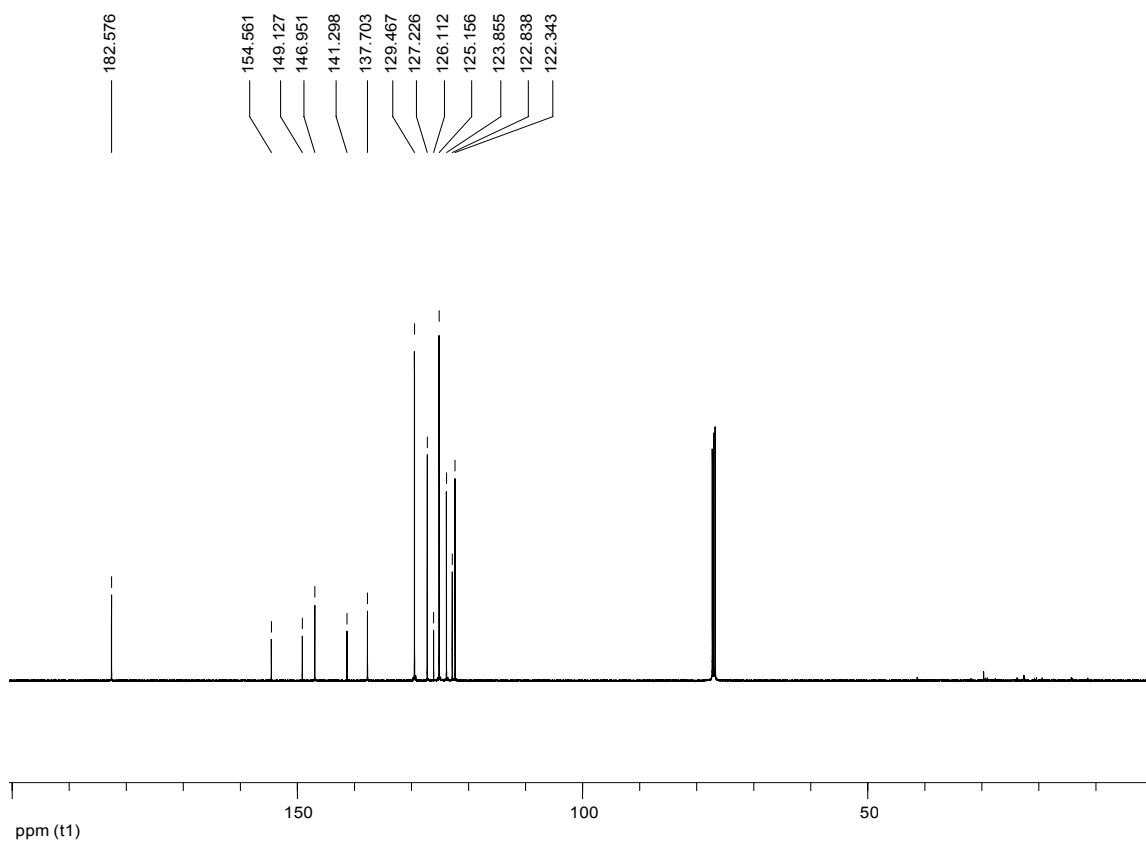

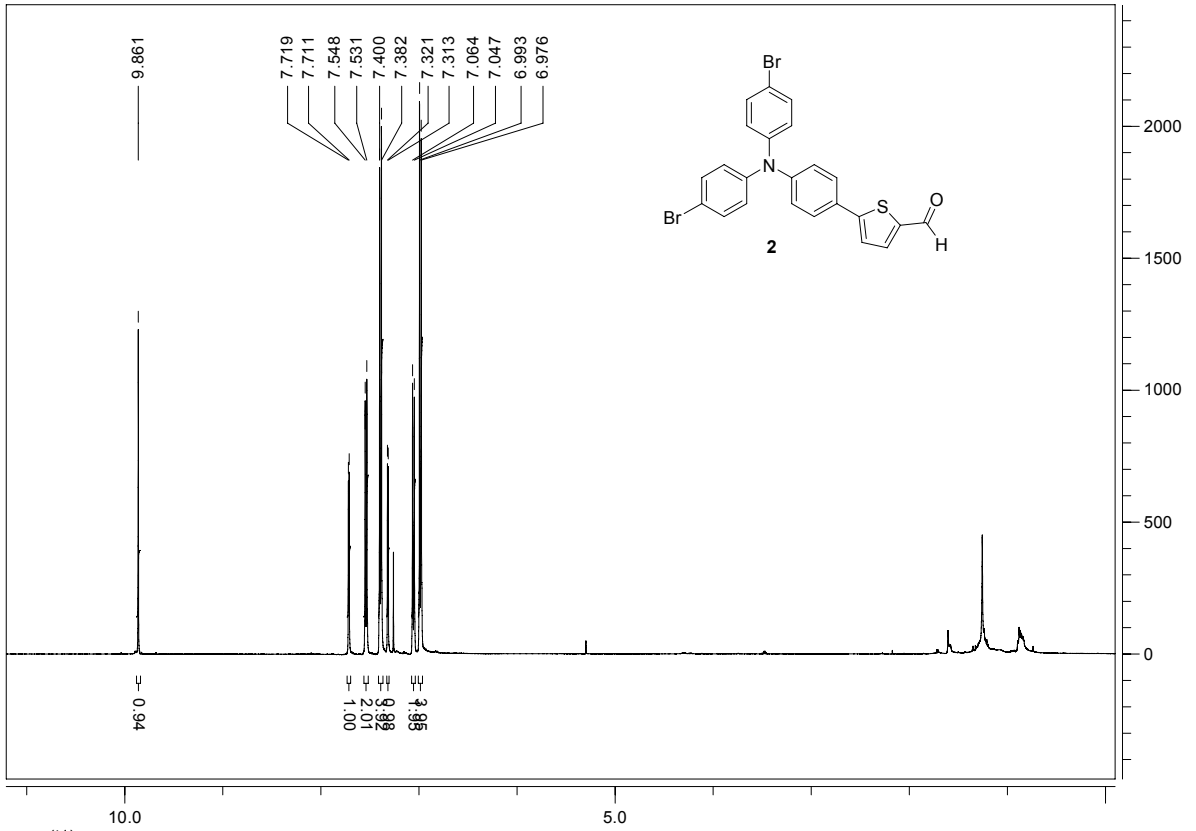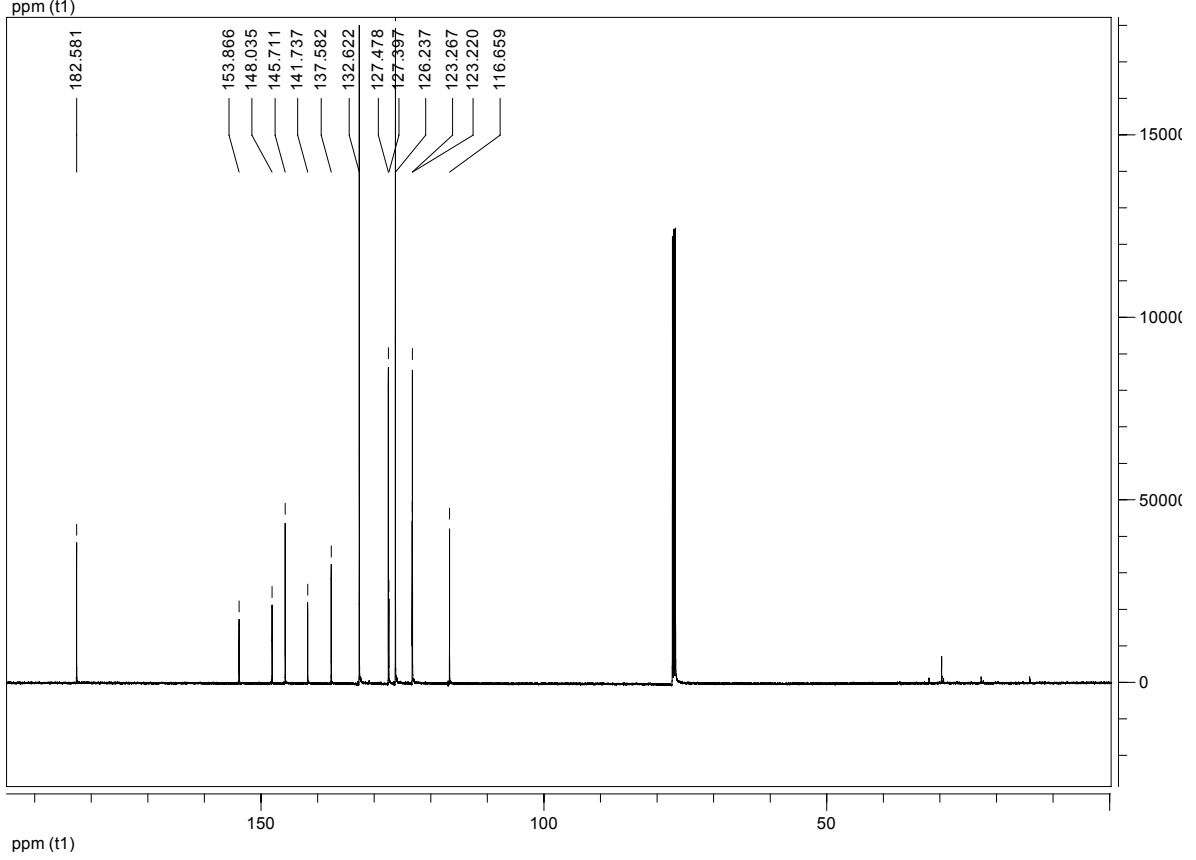

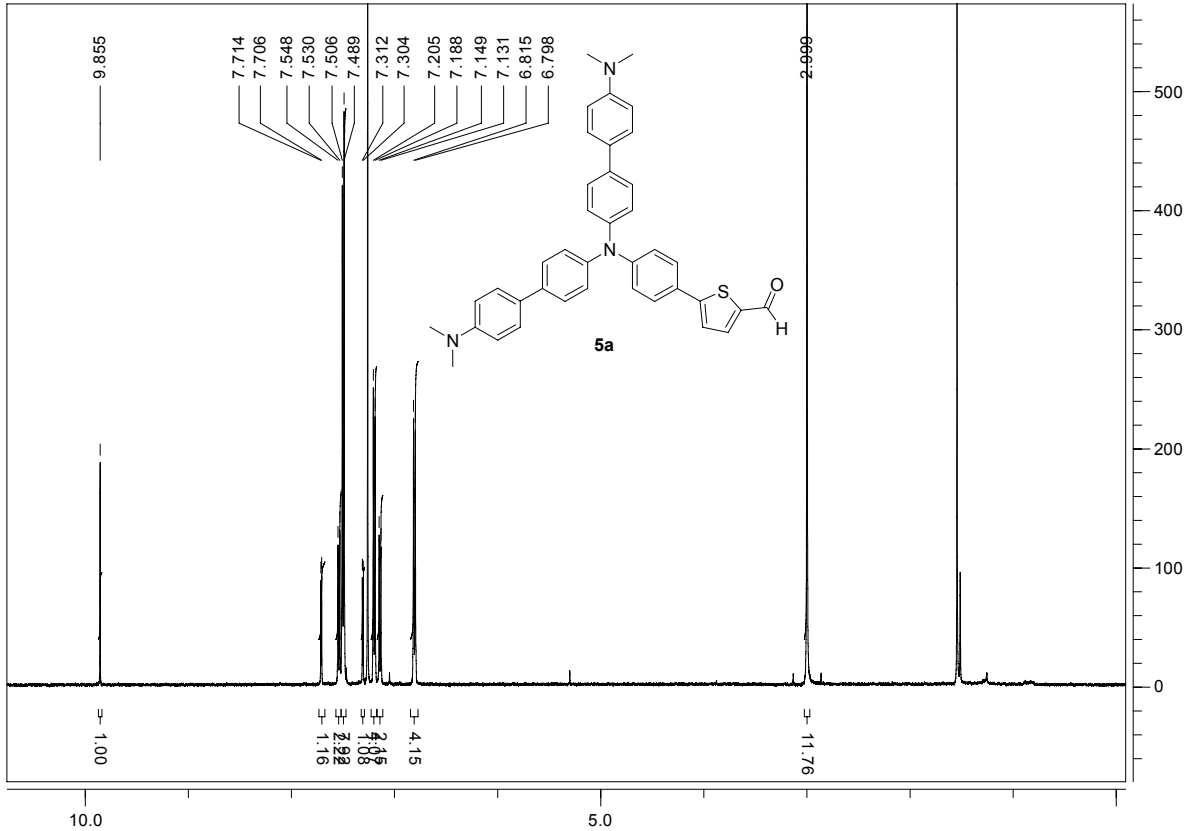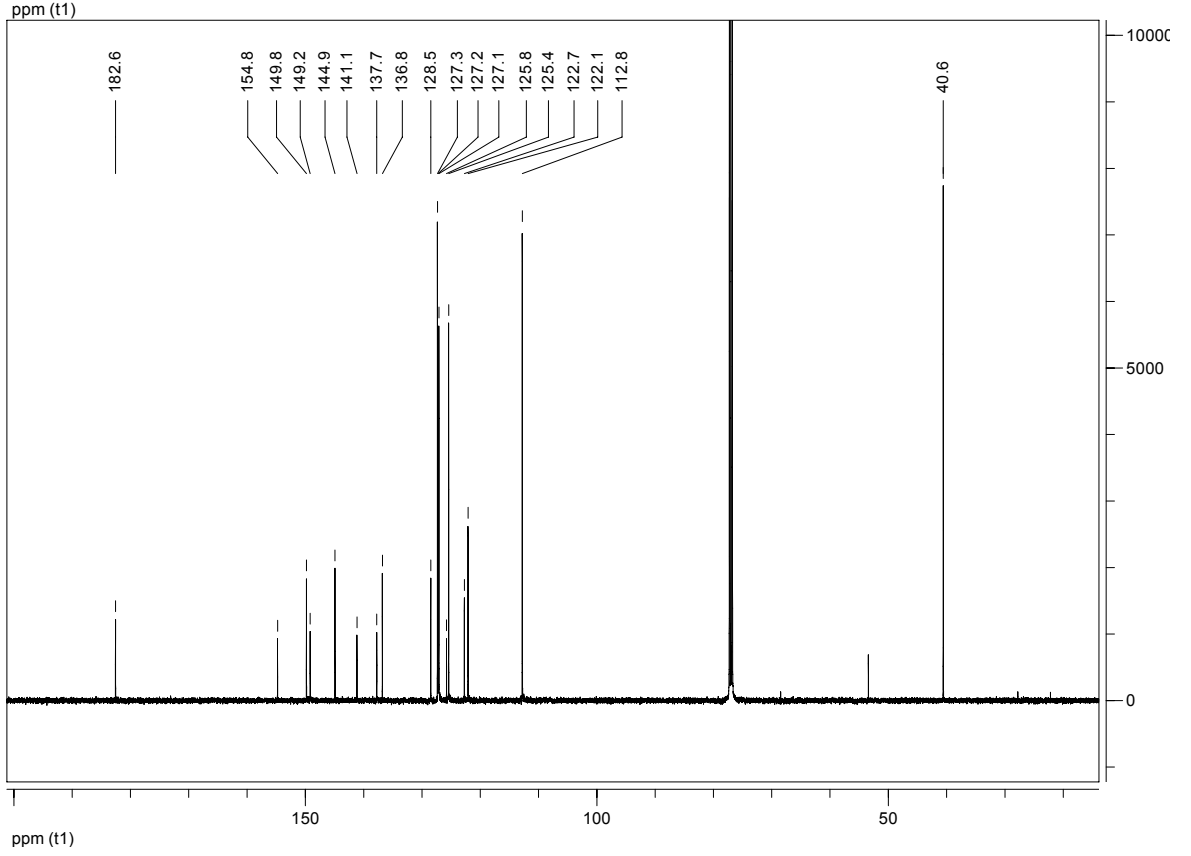

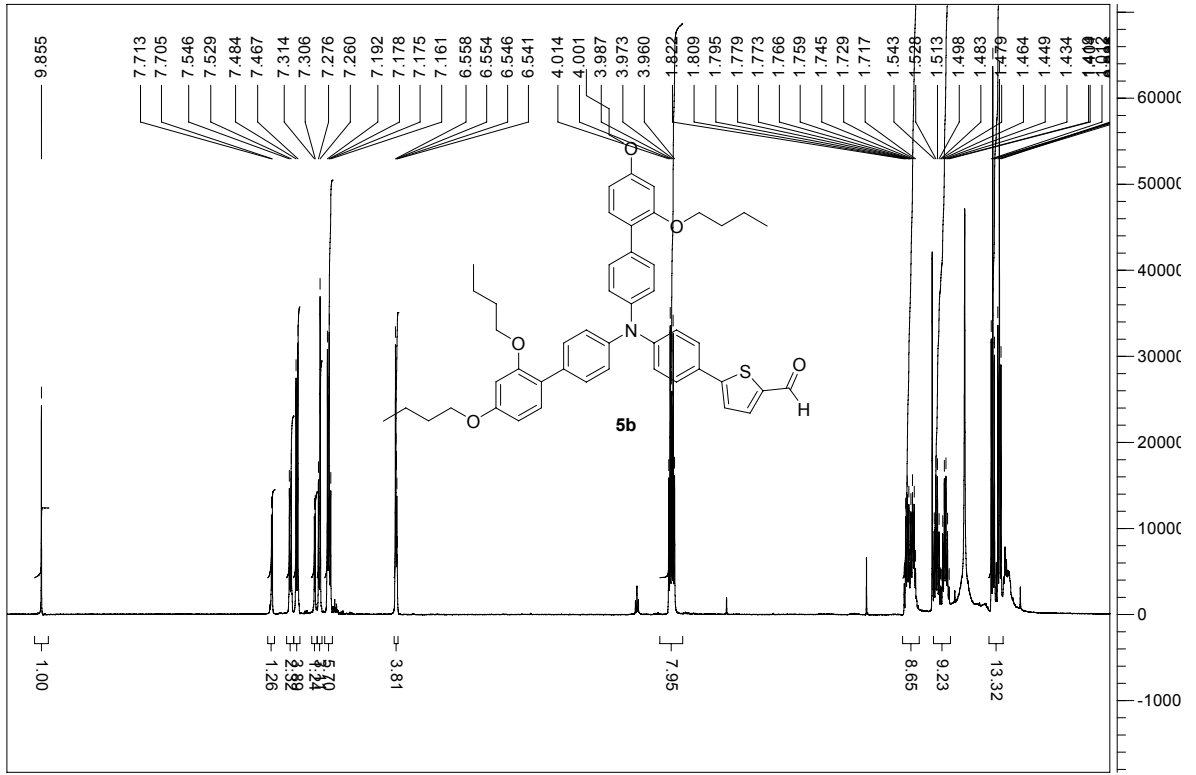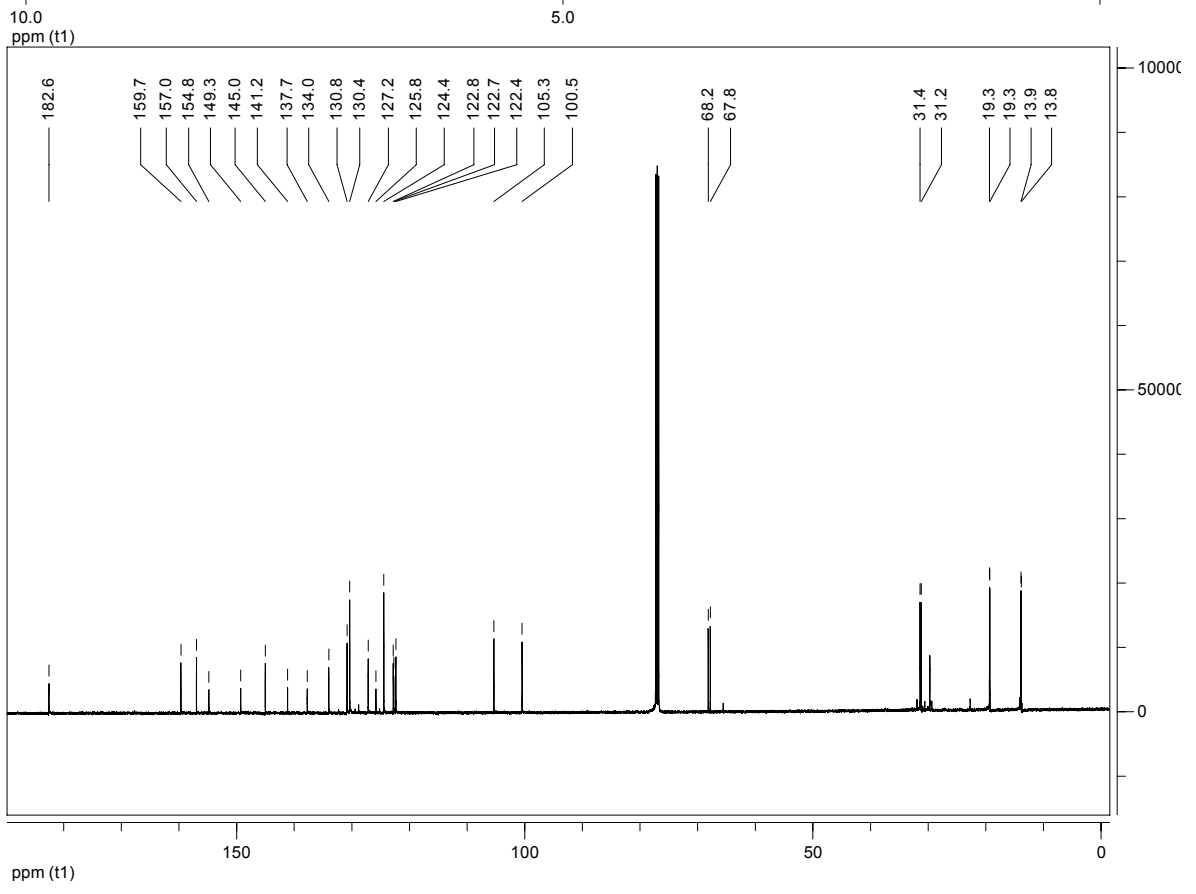

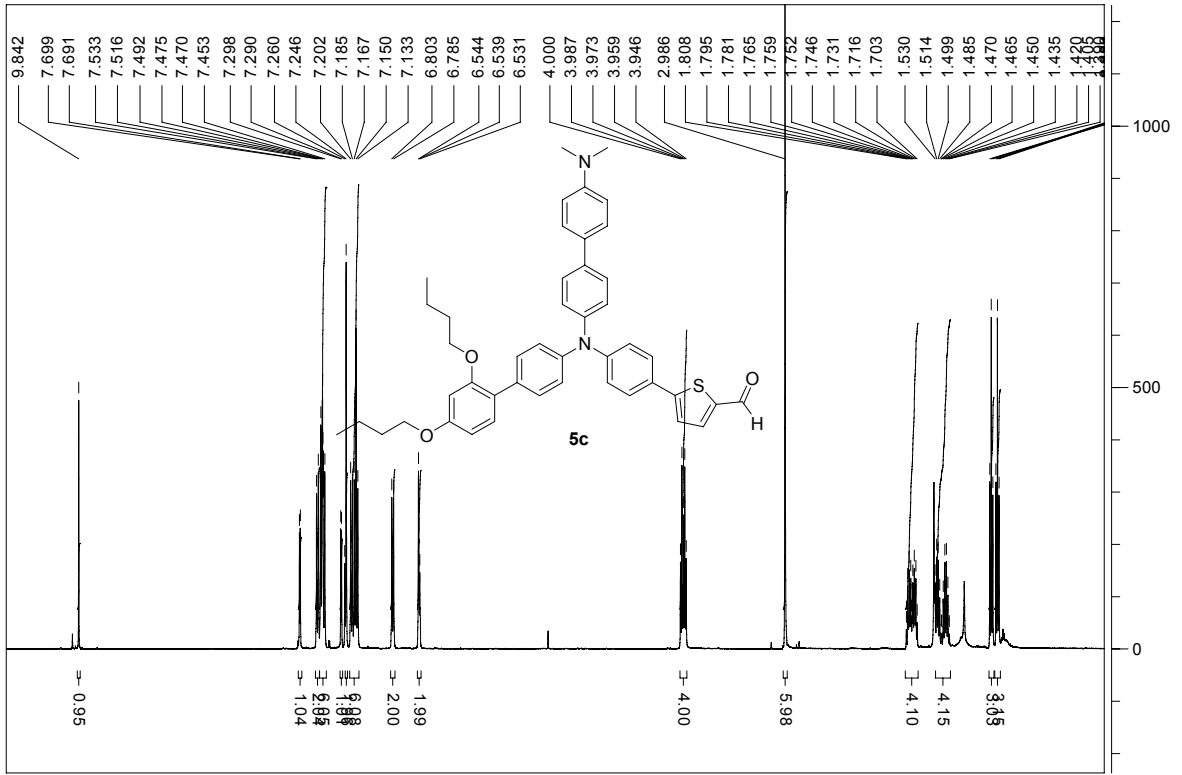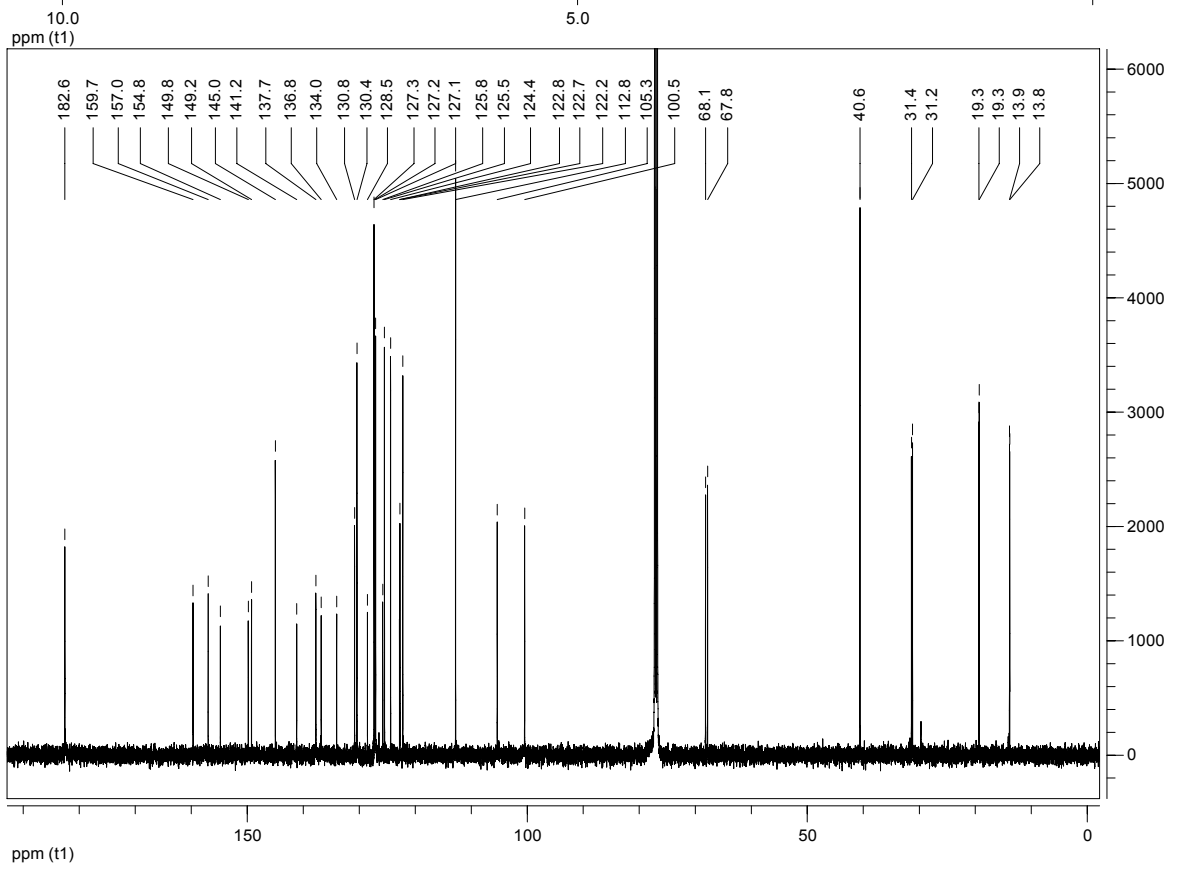

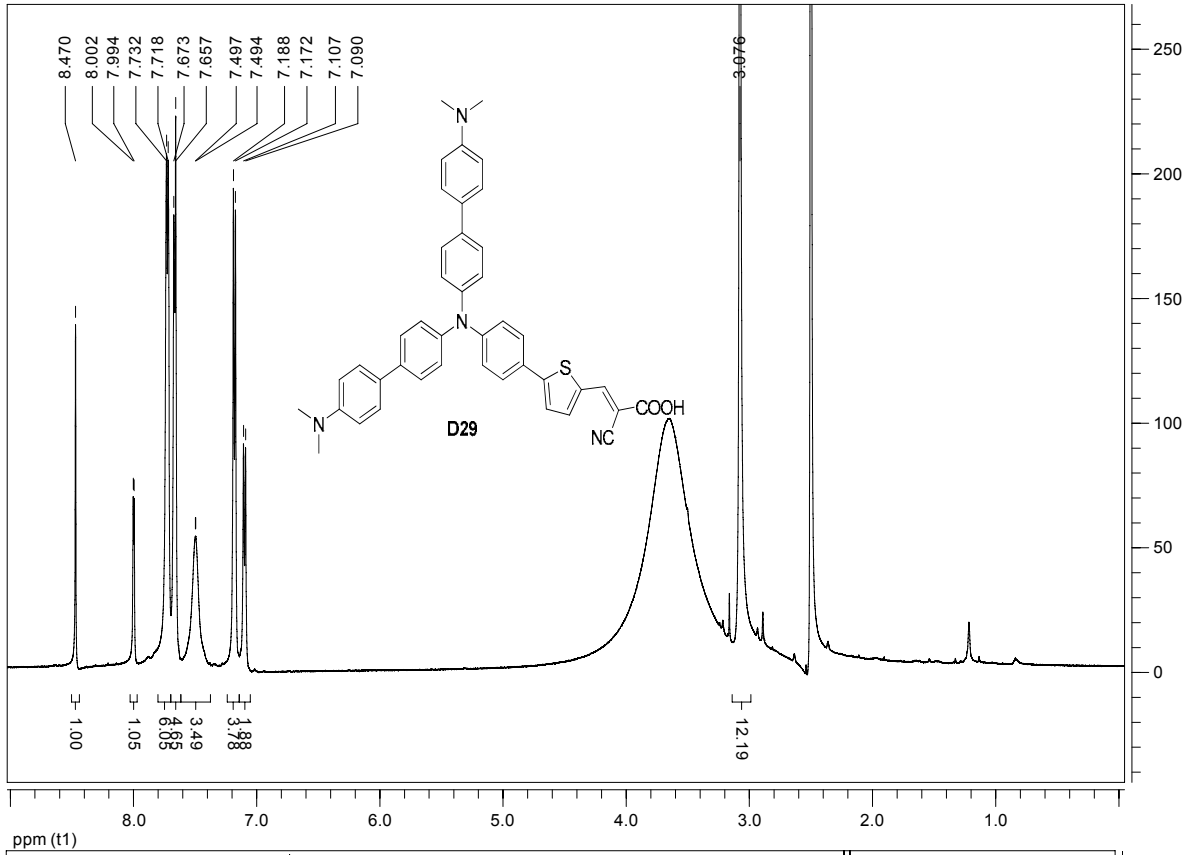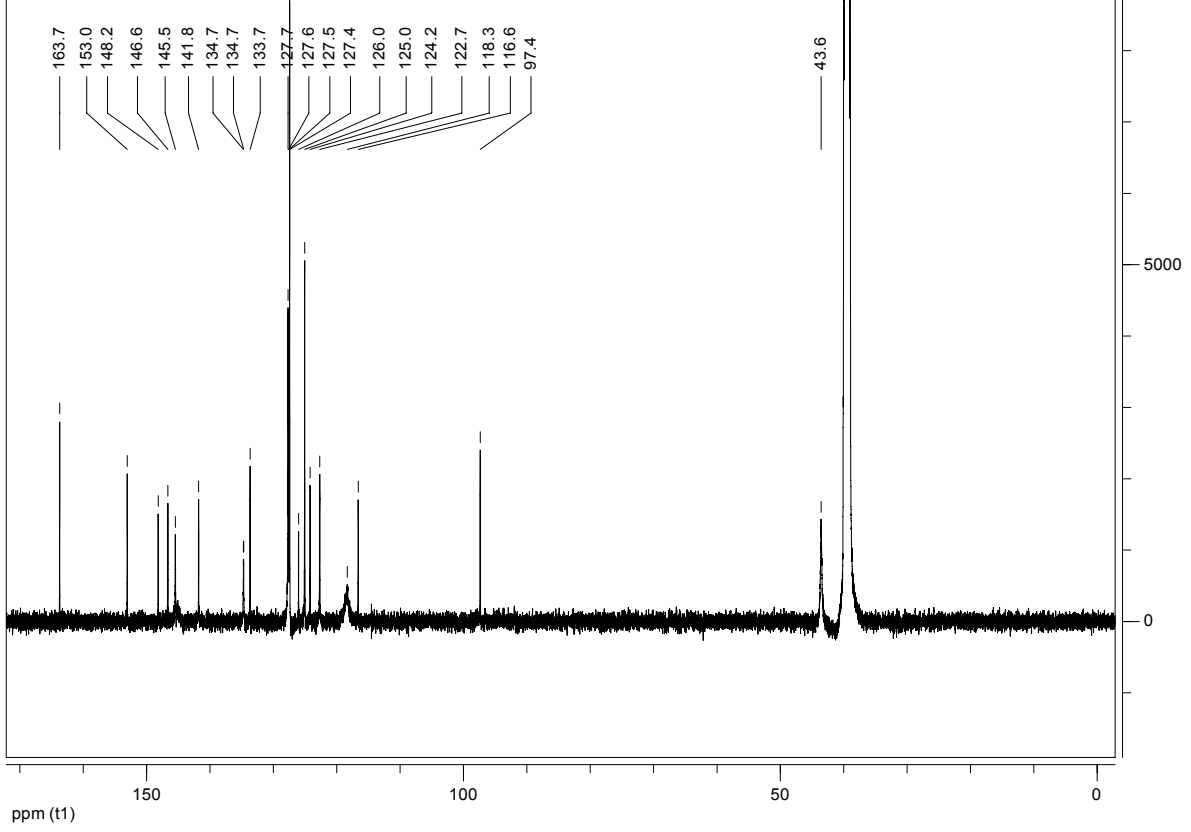



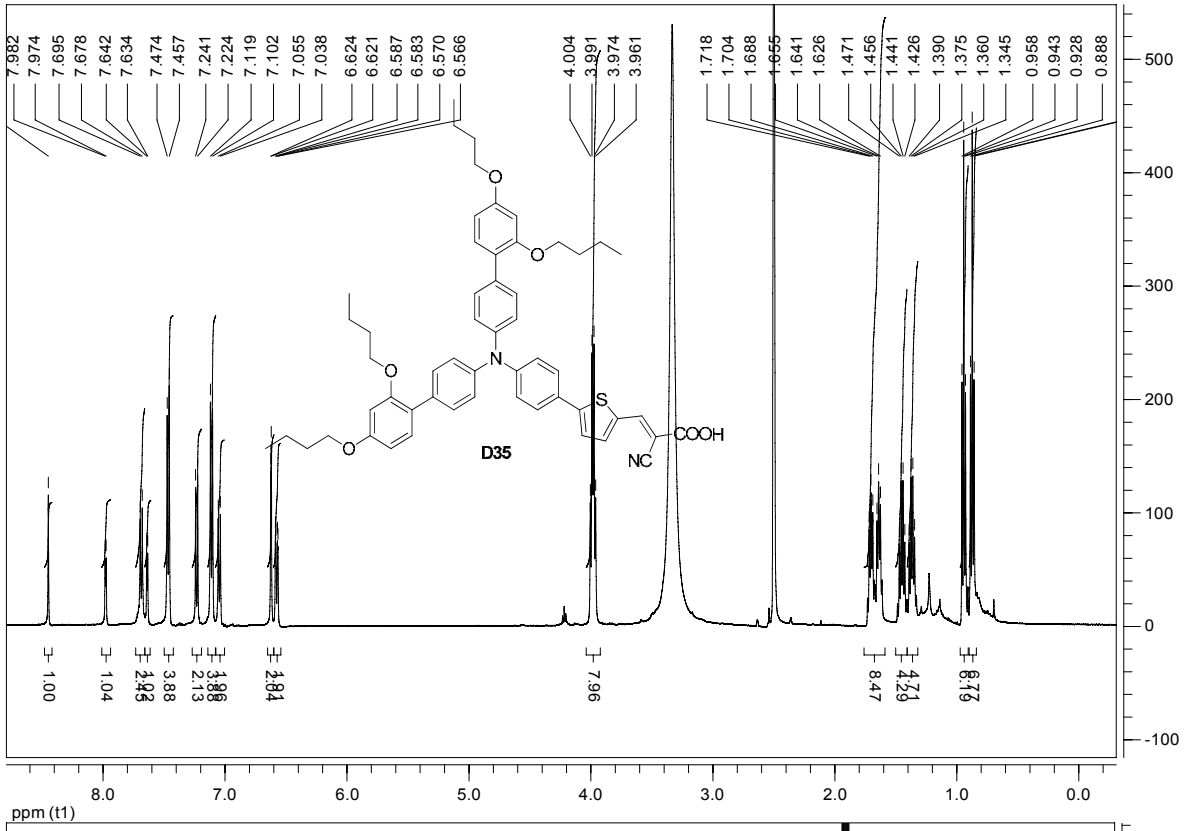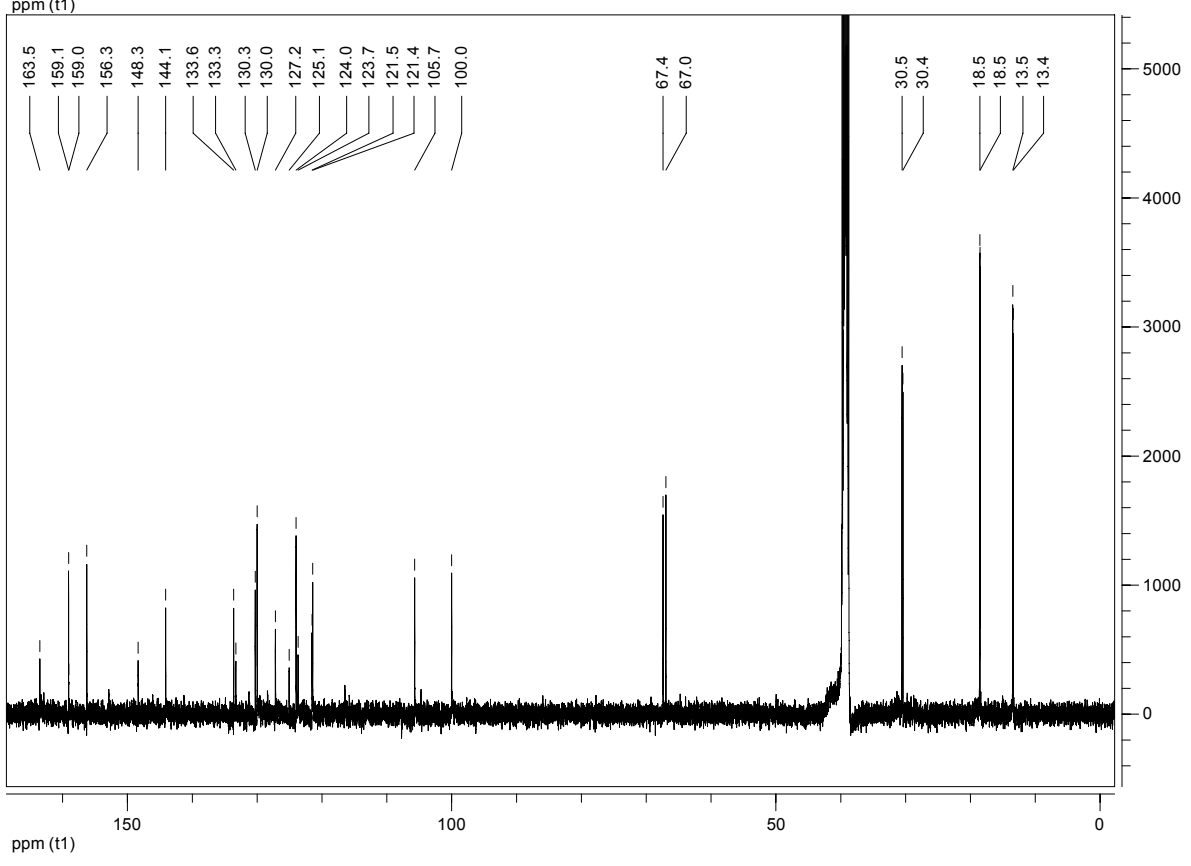

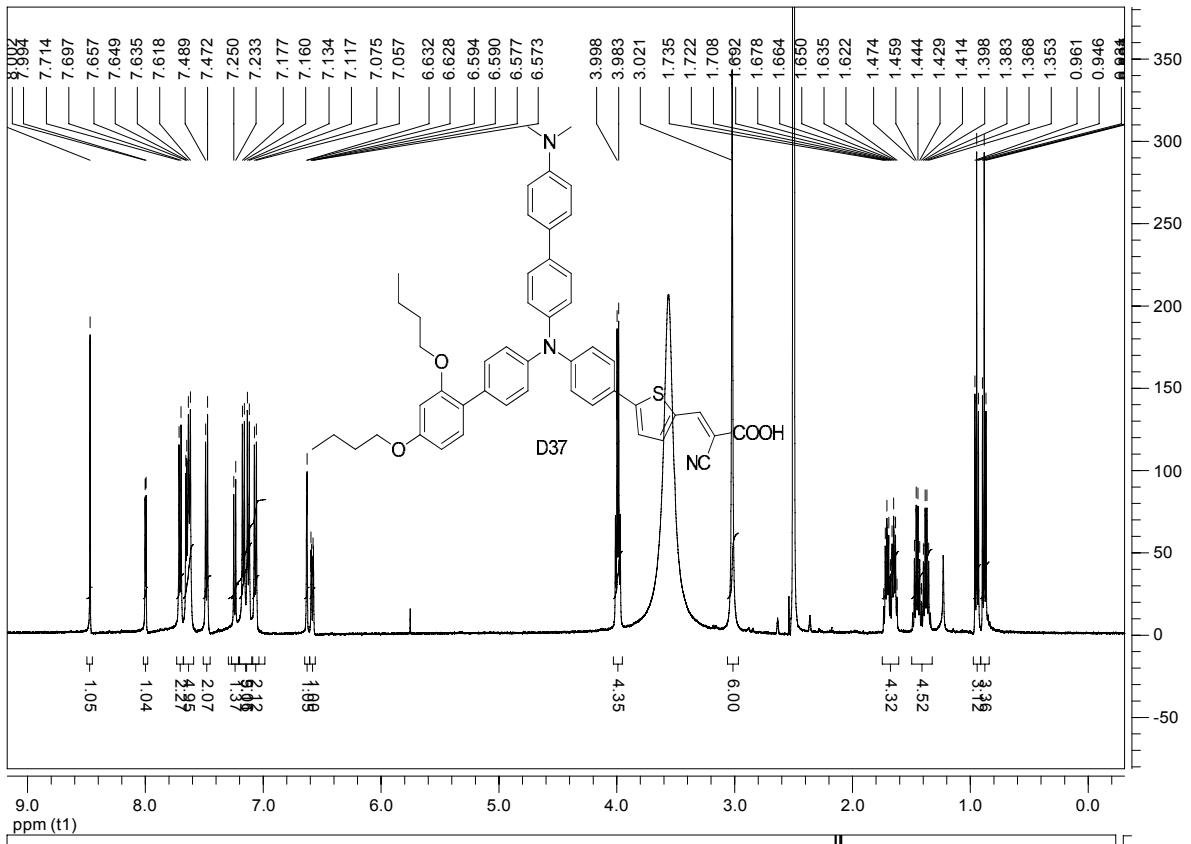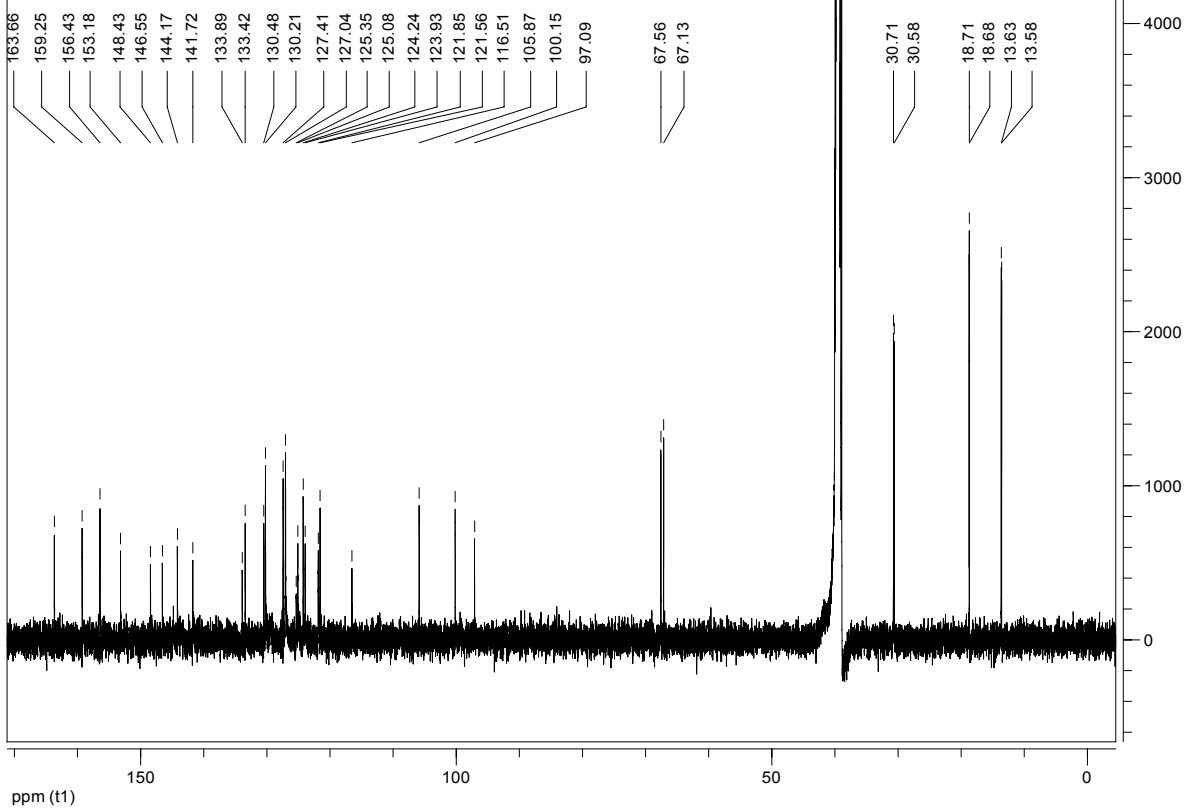

## Reference 29

M. J. Frisch, G. W. T., H. B. Schlegel, G. E. Scuseria, M. A. Robb, J. R. Cheeseman, J. A. Montgomery, Jr., T. Vreven, K. N. Kudin, J. C. Burant, J. M. Millam, S. S. Iyengar, J. Tomasi, V. Barone, B. Mennucci, M. Cossi, G. Scalmani, N. Rega, G. A. Petersson, H. Nakatsuji, M. Hada, M. Ehara, K. Toyota, R. Fukuda, J. Hasegawa, M. Ishida, T. Nakajima, Y. Honda, O. Kitao, H. Nakai, M. Klene, X. Li, J. E. Knox, H. P. Hratchian, J. B. Cross, C. Adamo, J. Jaramillo, R. Gomperts, R. E. Stratmann, O. Yazyev, A. J. Austin, R. Cammi, C. Pomelli, J. W. Ochterski, P. Y. Ayala, K. Morokuma, G. A. Voth, P. Salvador, J. J. Dannenberg, V. G. Zakrzewski, S. Dapprich, A. D. Daniels, M. C. Strain, O. Farkas, D. K. Malick, A. D. Rabuck, K. Raghavachari, J. B. Foresman, J. V. Ortiz, Q. Cui, A. G. Baboul, S. Clifford, J. Cioslowski, B. B. Stefanov, G. Liu, A. Liashenko, P. Piskorz, I. Komaromi, R. L. Martin, D. J. Fox, T. Keith, M. A. Al-Laham, C. Y. Peng, A. Nanayakkara, M. Challacombe, P. M. W. Gill, B. Johnson, W. Chen, M. W. Wong, C. Gonzalez, J. A. Pople, *GAUSSIAN 03 (Revision C.02)*, Gaussian, Inc., Pittsburgh PA, 2003.

**Table S1.** Calculated electronic and spectral data for the three dyes.

| Dye | $E_{HOMO}$ [eV] <sup>a</sup> | $E_{LUMO}$ [eV] <sup>a</sup> | $E_{H-L}$ [eV] <sup>b</sup> | Abs [nm] <sup>c</sup> | $f^{c,d}$  | Contribution <sup>c,e</sup> |
|-----|------------------------------|------------------------------|-----------------------------|-----------------------|------------|-----------------------------|
| D29 | 0.23                         | -2.04                        | 2.28                        | 602; 510              | 0.52; 0.02 | H→L:0.52; H-1→L:0.71        |
| D35 | 0.35                         | -2.04                        | 2.39                        | 572; 441              | 0.67; 0.04 | H→L:0.67; H-1→L:0.70        |
| D37 | 0.34                         | -2.02                        | 2.36                        | 588; 482              | 0.55; 0.23 | H→L:0.68; H-1→L:0.69        |

<sup>a</sup>Energy levels with respect to NHE. <sup>b</sup>HOMO-LUMO gap. Note that while the calculations do not reproduce the experimental HOMO and LUMO levels (presented in Table 1), the calculated gaps are quite accurate. <sup>c</sup>First and second transitions are reported. <sup>d</sup>Oscillator strengths, which are proportional to the integrated intensity of the specific absorption band. <sup>e</sup>Orbital coefficients of the most abundant contributions as reported in the Gaussian output.

## Molecular coordinates

Presented in .xyz format.

### D29

```
N      -0.796748      -0.043612      -0.068258
C      -1.297565       1.292152      -0.058126
C      -2.319490       1.661824       0.827665
C      -0.794432       2.256148      -0.944155
C      -2.819550       2.959592       0.824999
H      -2.711661       0.928440       1.525512
C      -1.294847       3.553839      -0.932446
H      -0.018453       1.979571      -1.651596
C      -2.320526       3.941452      -0.050551
H      -3.588308       3.226918       1.544473
H      -0.909368       4.271609      -1.651029
C       0.585603      -0.290351      -0.075533
C       1.115968      -1.438743      -0.699081
C       1.486570       0.602685       0.539780
C       2.480476      -1.679418      -0.701386
H       0.447809      -2.132473      -1.197467
C       2.849865       0.354653       0.528517
H       1.105438       1.484723       1.042337
```

|   |           |           |           |
|---|-----------|-----------|-----------|
| C | 3.388937  | -0.791989 | -0.088268 |
| H | 2.853894  | -2.556123 | -1.221962 |
| H | 3.508673  | 1.050230  | 1.042006  |
| C | -1.729896 | -1.123235 | -0.056118 |
| C | -1.574258 | -2.200204 | 0.828681  |
| C | -2.836393 | -1.115734 | -0.917198 |
| C | -2.492238 | -3.245346 | 0.835743  |
| H | -0.724031 | -2.220207 | 1.503726  |
| C | -3.761374 | -2.154090 | -0.885734 |
| C | -3.612613 | -3.249223 | -0.015127 |
| H | -2.330509 | -4.081810 | 1.509640  |
| H | -4.625859 | -2.106967 | -1.541777 |
| H | -2.975299 | -0.283179 | -1.599997 |
| C | 4.820183  | -1.064716 | -0.099627 |
| C | 5.462606  | -2.279480 | -0.320853 |
| S | 5.998280  | 0.190451  | 0.174746  |
| C | 6.863210  | -2.210701 | -0.261363 |
| H | 4.923180  | -3.204130 | -0.490776 |
| C | 7.347251  | -0.932821 | 0.009195  |
| H | 7.511204  | -3.067500 | -0.397319 |
| C | 8.669988  | -0.427882 | 0.160801  |
| H | 8.766626  | 0.632129  | 0.388580  |
| C | 9.875941  | -1.075258 | 0.062342  |
| C | 10.000655 | -2.463822 | -0.227754 |
| C | 11.101380 | -0.267031 | 0.273334  |
| N | 10.066948 | -3.602668 | -0.466085 |
| O | 11.116174 | 0.922511  | 0.526647  |
| O | 12.230541 | -1.003948 | 0.152960  |
| H | 12.969866 | -0.387380 | 0.307511  |
| C | -2.851395 | 5.322673  | -0.044756 |
| C | -4.201362 | 5.594307  | 0.232640  |
| C | -2.029153 | 6.430626  | -0.308460 |
| C | -4.707334 | 6.888087  | 0.245267  |
| H | -4.884437 | 4.770452  | 0.422055  |
| C | -2.516949 | 7.731473  | -0.300225 |
| C | -3.879025 | 7.999679  | -0.032604 |
| H | -5.759496 | 7.029282  | 0.462080  |
| H | -1.825548 | 8.543467  | -0.491197 |
| C | -4.594126 | -4.357218 | 0.006776  |
| C | -4.923679 | -5.027979 | 1.196068  |
| C | -5.248213 | -4.788162 | -1.159106 |
| C | -5.844954 | -6.067401 | 1.227508  |
| C | -6.171219 | -5.826554 | -1.147710 |
| H | -5.014218 | -4.315627 | -2.109503 |
| C | -6.490324 | -6.507997 | 0.049222  |
| H | -6.069834 | -6.529232 | 2.181454  |
| H | -6.636450 | -6.114383 | -2.082971 |
| H | -0.969072 | 6.277482  | -0.492931 |
| H | -4.472658 | -4.709303 | 2.132232  |
| N | -4.382614 | 9.293982  | -0.051037 |
| N | -7.388292 | -7.567231 | 0.064893  |
| C | -3.463008 | 10.414769 | -0.143930 |
| H | -4.035192 | 11.344160 | -0.174910 |
| H | -2.763619 | 10.468444 | 0.706234  |
| H | -2.871438 | 10.361129 | -1.065578 |
| C | -5.721775 | 9.543464  | 0.454419  |
| H | -5.948082 | 10.606943 | 0.355781  |

|   |           |           |           |
|---|-----------|-----------|-----------|
| H | -6.471065 | 8.992351  | -0.126505 |
| H | -5.838755 | 9.262371  | 1.513480  |
| C | -7.831574 | -8.107042 | 1.338517  |
| H | -8.364724 | -7.366676 | 1.956850  |
| H | -8.504420 | -8.947216 | 1.155671  |
| H | -6.982913 | -8.485490 | 1.920745  |
| C | -8.190396 | -7.838821 | -1.115693 |
| H | -7.555125 | -8.081284 | -1.976190 |
| H | -8.826712 | -8.704902 | -0.923569 |
| H | -8.836475 | -6.992072 | -1.398472 |

### D35

|   |           |           |           |
|---|-----------|-----------|-----------|
| N | -0.544635 | -0.014810 | -0.127958 |
| C | -0.658650 | 1.407025  | -0.071849 |
| C | -1.543475 | 2.013102  | 0.829334  |
| C | 0.097122  | 2.222961  | -0.926692 |
| C | -1.667259 | 3.398730  | 0.866418  |
| H | -2.127251 | 1.394341  | 1.503812  |
| C | -0.022520 | 3.607517  | -0.872312 |
| H | 0.773876  | 1.764926  | -1.641778 |
| C | -0.912456 | 4.231042  | 0.020716  |
| H | -2.343250 | 3.848350  | 1.588371  |
| H | 0.567397  | 4.215946  | -1.547861 |
| C | 0.716107  | -0.631277 | -0.143505 |
| C | 0.916804  | -1.862262 | -0.802227 |
| C | 1.822956  | -0.038032 | 0.498082  |
| C | 2.162716  | -2.468091 | -0.811764 |
| H | 0.088444  | -2.330717 | -1.322032 |
| C | 3.065963  | -0.650045 | 0.478591  |
| H | 1.694501  | 0.899933  | 1.026714  |
| C | 3.274724  | -1.882603 | -0.171929 |
| H | 2.285651  | -3.397726 | -1.359271 |
| H | 3.886394  | -0.177447 | 1.012576  |
| C | -1.739553 | -0.794052 | -0.169533 |
| C | -1.898814 | -1.913559 | 0.661020  |
| C | -2.789214 | -0.438165 | -1.026374 |
| C | -3.069179 | -2.663821 | 0.621812  |
| H | -1.097123 | -2.196491 | 1.336540  |
| C | -3.963755 | -1.184634 | -1.045606 |
| C | -4.132235 | -2.318814 | -0.232046 |
| H | -3.166085 | -3.525956 | 1.271242  |
| H | -4.773149 | -0.876573 | -1.701528 |
| H | -2.685848 | 0.432386  | -1.666623 |
| C | 4.575183  | -2.538943 | -0.190344 |
| C | 4.857904  | -3.878708 | -0.440151 |
| S | 6.052829  | -1.665265 | 0.113467  |
| C | 6.222288  | -4.201641 | -0.378993 |
| H | 4.084332  | -4.613529 | -0.631055 |
| C | 7.039543  | -3.114187 | -0.078411 |
| H | 6.608729  | -5.201119 | -0.534521 |
| C | 8.449248  | -2.999371 | 0.084817  |
| H | 8.834653  | -2.013125 | 0.337103  |
| C | 9.429054  | -3.953615 | -0.028870 |
| C | 9.165532  | -5.315410 | -0.351081 |
| C | 10.829177 | -3.522275 | 0.200524  |
| N | 8.914849  | -6.422317 | -0.615837 |

|   |            |           |           |
|---|------------|-----------|-----------|
| O | 11.172237  | -2.389371 | 0.480572  |
| O | 11.710225  | -4.540955 | 0.063743  |
| H | 12.590539  | -4.157354 | 0.232663  |
| C | -1.109925  | 5.702317  | 0.056649  |
| C | -2.405812  | 6.233843  | 0.152085  |
| C | -0.041925  | 6.628628  | 0.019697  |
| C | -2.659054  | 7.598181  | 0.205949  |
| H | -3.244865  | 5.543870  | 0.163169  |
| C | -0.277243  | 8.009335  | 0.069582  |
| C | -1.587765  | 8.496077  | 0.164626  |
| H | -3.669843  | 7.986150  | 0.271841  |
| H | 0.557069   | 8.694679  | 0.036162  |
| C | -5.375262  | -3.126520 | -0.328065 |
| C | -6.065121  | -3.625960 | 0.809242  |
| C | -5.930222  | -3.410154 | -1.579367 |
| C | -7.238426  | -4.362774 | 0.662980  |
| C | -7.105055  | -4.147148 | -1.747079 |
| H | -5.409166  | -3.056571 | -2.464743 |
| C | -7.761575  | -4.626084 | -0.612042 |
| H | -7.782003  | -4.746530 | 1.516739  |
| H | -7.478623  | -4.342415 | -2.744821 |
| O | -1.922376  | 9.818064  | 0.235436  |
| O | -8.911918  | -5.359078 | -0.624568 |
| C | -0.915572  | 10.827768 | 0.140173  |
| H | -1.385305  | 11.716235 | 0.572158  |
| H | -0.056630  | 10.572151 | 0.774389  |
| C | -9.515650  | -5.662636 | -1.882029 |
| H | -8.814486  | -6.238818 | -2.502418 |
| H | -9.750937  | -4.731105 | -2.416140 |
| O | -5.526591  | -3.326588 | 2.027460  |
| O | 1.218103   | 6.103926  | -0.051176 |
| C | 2.350221   | 6.968787  | 0.012936  |
| H | 2.345688   | 7.658472  | -0.843649 |
| H | 2.307467   | 7.570556  | 0.931893  |
| C | -6.214444  | -3.728278 | 3.212196  |
| H | -7.228832  | -3.305478 | 3.212675  |
| H | -6.305774  | -4.823344 | 3.238643  |
| C | -5.413818  | -3.222039 | 4.399568  |
| H | -4.408258  | -3.654360 | 4.402211  |
| H | -5.320357  | -2.132289 | 4.364754  |
| H | -5.912839  | -3.499967 | 5.334190  |
| C | -10.776512 | -6.462136 | -1.603272 |
| H | -11.274028 | -6.720563 | -2.544240 |
| H | -10.536388 | -7.388105 | -1.071391 |
| H | -11.473036 | -5.882494 | -0.989422 |
| C | -0.492816  | 11.102489 | -1.299788 |
| H | -0.026500  | 10.226125 | -1.760150 |
| H | -1.363656  | 11.380343 | -1.901872 |
| H | 0.225872   | 11.929810 | -1.328933 |
| C | 3.593265   | 6.095637  | -0.005007 |
| H | 3.593968   | 5.410347  | 0.848035  |
| H | 3.636733   | 5.502439  | -0.923745 |
| H | 4.491719   | 6.719925  | 0.047701  |

**D37**

|   |           |           |           |
|---|-----------|-----------|-----------|
| N | -0.422510 | 0.364572  | -0.181329 |
| C | -0.709600 | 1.761936  | -0.165903 |
| C | -1.676012 | 2.278659  | 0.708677  |
| C | -0.049490 | 2.642544  | -1.035342 |
| C | -1.969139 | 3.638255  | 0.711377  |
| H | -2.187969 | 1.609249  | 1.393118  |
| C | -0.343193 | 4.001964  | -1.018170 |
| H | 0.684701  | 2.253760  | -1.734499 |
| C | -1.310315 | 4.537067  | -0.147414 |
| H | -2.698906 | 4.016557  | 1.421549  |
| H | 0.159112  | 4.656660  | -1.724658 |
| C | 0.903856  | -0.095612 | -0.178281 |
| C | 1.252271  | -1.312478 | -0.800565 |
| C | 1.929545  | 0.643247  | 0.446508  |
| C | 2.561406  | -1.765835 | -0.791520 |
| H | 0.487835  | -1.891563 | -1.306540 |
| C | 3.236798  | 0.183382  | 0.445405  |
| H | 1.688477  | 1.573817  | 0.948079  |
| C | 3.593353  | -1.033690 | -0.169059 |
| H | 2.796108  | -2.689791 | -1.311348 |
| H | 3.992974  | 0.765959  | 0.965317  |
| C | -1.512998 | -0.556514 | -0.202617 |
| C | -1.544294 | -1.654537 | 0.670161  |
| C | -2.585272 | -0.366721 | -1.083771 |
| C | -2.611147 | -2.546368 | 0.647714  |
| H | -0.723460 | -1.808963 | 1.364047  |
| C | -3.656665 | -1.255324 | -1.087354 |
| C | -3.694431 | -2.370249 | -0.231965 |
| H | -2.610384 | -3.388820 | 1.329588  |
| H | -4.487287 | -1.076721 | -1.764507 |
| H | -2.581118 | 0.484605  | -1.757431 |
| C | 4.963466  | -1.529313 | -0.169648 |
| C | 5.406259  | -2.831440 | -0.383296 |
| S | 6.324210  | -0.475738 | 0.108007  |
| C | 6.799556  | -2.985542 | -0.315079 |
| H | 4.727758  | -3.659310 | -0.553918 |
| C | 7.478866  | -1.799586 | -0.045367 |
| H | 7.303877  | -3.934968 | -0.444400 |
| C | 8.864196  | -1.510989 | 0.113059  |
| H | 9.127298  | -0.478414 | 0.335506  |
| C | 9.951824  | -2.343415 | 0.026942  |
| C | 9.854731  | -3.735902 | -0.254578 |
| C | 11.289492 | -1.740628 | 0.242780  |
| N | 9.739580  | -4.872219 | -0.486327 |
| O | 11.493449 | -0.566949 | 0.488290  |
| O | 12.286488 | -2.650295 | 0.136919  |
| H | 13.114084 | -2.159341 | 0.293999  |
| C | -1.622093 | 5.983636  | -0.138959 |
| C | -2.920799 | 6.458368  | 0.108359  |
| C | -0.632999 | 6.953186  | -0.373033 |
| C | -3.222529 | 7.814439  | 0.117387  |
| H | -3.726992 | 5.748689  | 0.274820  |
| C | -0.915512 | 8.313483  | -0.367535 |
| C | -2.226949 | 8.786620  | -0.132839 |
| H | -4.245975 | 8.114419  | 0.308727  |

|   |            |           |           |
|---|------------|-----------|-----------|
| H | -0.102920  | 9.010533  | -0.534146 |
| C | -4.821953  | -3.334126 | -0.311217 |
| C | -5.465718  | -3.869203 | 0.836695  |
| C | -5.307383  | -3.742044 | -1.556939 |
| C | -6.527846  | -4.761242 | 0.705589  |
| C | -6.371042  | -4.634826 | -1.709470 |
| H | -4.817680  | -3.361417 | -2.448970 |
| C | -6.982430  | -5.148021 | -0.564276 |
| H | -7.034609  | -5.176988 | 1.567046  |
| H | -6.694073  | -4.920359 | -2.703076 |
| H | 0.395542   | 6.639820  | -0.531886 |
| N | -2.526272  | 10.142602 | -0.156843 |
| C | -1.445603  | 11.110108 | -0.233747 |
| H | -1.868870  | 12.115253 | -0.284762 |
| H | -0.765795  | 11.065705 | 0.632742  |
| H | -0.847977  | 10.957916 | -1.140331 |
| C | -3.823232  | 10.593907 | 0.317393  |
| H | -3.879703  | 11.680163 | 0.223426  |
| H | -4.634001  | 10.168587 | -0.286500 |
| H | -4.009445  | 10.328827 | 1.370622  |
| O | -8.023075  | -6.029951 | -0.561467 |
| C | -8.544001  | -6.477423 | -1.812901 |
| H | -7.749089  | -6.966708 | -2.393492 |
| H | -8.905409  | -5.617438 | -2.394556 |
| O | -4.998331  | -3.447560 | 2.048070  |
| C | -5.651719  | -3.886645 | 3.238955  |
| H | -5.589468  | -4.981289 | 3.317557  |
| H | -6.714937  | -3.611334 | 3.200770  |
| C | -9.674874  | -7.447175 | -1.517219 |
| H | -10.108194 | -7.816657 | -2.452877 |
| H | -9.308199  | -8.303106 | -0.942034 |
| H | -10.463613 | -6.955571 | -0.939108 |
| C | -4.958898  | -3.218220 | 4.413804  |
| H | -3.902263  | -3.501092 | 4.453297  |
| H | -5.021027  | -2.128955 | 4.329004  |
| H | -5.434496  | -3.522963 | 5.352274  |
